# Supplementary material for: The general public’s perceptions of advance care planning (ACP) in the Asia-Pacific region: a systematic review
Source: Research Square preprint supplement (doi:10.21203/rs.3.rs-5099874/v1), 2026-01-20
Supplement: Supplementary file 1 [file 281998b91b1c38ec3a88c09e.docx]

**Additional file 1**

**Table A1:** Search strategy used across databases.

|  | **PubMed** | **CINAHL** | **PsycINFO** | **Embase** | **Emcare** |
| --- | --- | --- | --- | --- | --- |
| **ACP** | (("advance care planning"[MeSH Terms]) OR ("living wills"[MeSH Terms])) OR ("advance directives"[MeSH Terms]) | (MM "Advance Care Planning") OR (MH "Advance Directives+") OR (MH "Living Wills") | MA "advance care planning" OR MA "advance directives" OR MA "living will" | 'advance care planning'/mj OR 'living will'/exp | *advance care planning/ OR living will/ |
| **Public’s** | public opinion[MeSH Terms] | (MH public opinion) | (MA public opinion) | 'public opinion'/exp | public opinion/ |
| **perception** | perception[MeSH Terms] | (MH "Perception+") | MA perception | OR 'perception'/exp | perception/ |
| **Awareness** | awareness[MeSH Terms] | (MH "Self-Awareness") OR (MH "Cognition+") | (MA awareness) | 'awareness'/exp | awareness/ |
| **Attitude** | ("attitude to health"[MeSH Terms]) OR ("attitude to death"[MeSH Terms]) | (MH "Attitude to Illness+") OR (MH "Attitude to Death+") OR (MH "Attitude to Health+") OR (MH "Social Attitudes") | MA "attitude to health" OR MA "attitude to illness" OR MA "attitude to death" | 'attitude to health'/exp OR 'attitude to illness'/exp OR 'attitude to death'/exp OR 'social attitude'/exp | attitude to health/ or social attitude/ or attitude to death/ or attitude to illness/ |
| **Experience** | life experience[MeSH Terms] | (MH "Life Experiences+") | MA experience | 'experience'/exp OR 'personal experience'/exp | experience/ or personal experience/ |
| **Expectation** | "Patient Preference"[MeSH Terms] | (MH "Patient Preference") | MA "Patient Preference" | 'patient preference'/exp | patient preference/ |
| **Asia-Pacific** | ("asia"[MeSH Terms]) OR ("asian"[MeSH Terms]) | (MH "Asia+") OR (MH "Asians+") | MA Asia OR MA asian | 'asia'/exp OR 'asian'/exp | Asia/ OR Asian/ |
| ("pacific island people"[MeSH Terms]) OR ("pacific islands"[MeSH Terms]) | (MH "Pacific Islanders") OR (MH "Pacific Islands+") | MA pacific OR MA "pacific islands" | 'pacific islands'/exp OR 'pacific islander'/exp | Pacific Islander/ or Pacific islands/ |

CINAHL – Cumulative Index of Nursing and Allied Health Literature. *Search term abbreviations:* MA - MeSH Subject Heading (in PsycINFO), MeSH – Medical Subject Headings (in PubMed), MH - Exact Subject Heading (in CINAHL), MM – Exact Major Subject Heading (in CINAHL)

**Table A2:** Quality appraisal of included studies using Mixed Methods Appraisal Tool (MMAT)1 criteria

| **Author/Year** | **Authors** | **Sampling strategy relevant** | **Sample representative** | **Measurements appropriate** | **Low nonresponse bias risk** | **Statistical analysis appropriate** | **Score of MMAT** | **% Agreement** | **% MMAT** |
| --- | --- | --- | --- | --- | --- | --- | --- | --- | --- |
| **Chan et al., 2019** | PP | 1 | 1 | 1 | ? | 1 | 4 | 100 | 80 |
| SC | 1 | 1 | 1 | ? | 1 | 4 |
| **Chung et al., 2017** | PP | 1 | 1 | ? | ? | 1 | 3 | 100 | 60 |
| SC | 1 | 1 | ? | ? | 1 | 3 |
| **Groenewoud et al., 2020** | PP | 1 | 1 | ? | ? | 1 | 3 | 80 | 60 |
| GS | 1 | 1 | 1 | ? | 1 | 4 |
| **Keam et al., 2013** | PP | 1 | 1 | ? | 1 | 1 | 4 | 100 | 80 |
| SC | 1 | 1 | ? | 1 | 1 | 4 |
| **Leong et al., 2021** | PP | 1 | 1 | 1 | 1 | 1 | 5 | 80 | 80 |
| SC | 1 | 1 | 1 | ? | 1 | 4 |
| **Lim et al., 2022** | PP | 1 | ? | 1 | 1 | 1 | 4 | 60 | 60 |
| SC | 1 | 1 | 1 | ? | 1 | 4 |
| **Ng et al., 2017** | PP | 1 | 1 | 1 | 0 | 1 | 4 | 80 | 60 |
| GS | 1 | ? | 1 | 0 | 1 | 3 |
| **Ni et al., 2021** | PP | ? | 1 | ? | ? | 1 | 3 | 60 | 40 |
| GS | 1 | 1 | 1 | ? | 1 | 4 |
| **Park et al., 2019** | PP | 1 | 1 | ? | ? | 1 | 3 | 80 | 60 |
| GS | 1 | 1 | 1 | ? | 1 | 4 |
| **Sellars et al., 2021** | PP | 1 | 1 | ? | 1 | 1 | 4 | 80 | 80 |
| GS | 1 | 1 | 1 | 1 | 1 | 5 |
| **Whyte et al., 2022** | PP | 1 | 1 | 1 | ? | 1 | 4 | 100 | 80 |
| GS | 1 | 1 | 1 | ? | 1 | 4 |

1 Reference for MMAT:Hong et al., 2018.

0 = No, does not meet this criterion; 1 = Yes, meets this criterion ? = Can’t tell, not enough information provided to determine if meets this criterion or not
