# Supplementary material for: The general public’s perceptions of advance care planning (ACP) in the Asia-Pacific region: a systematic review
Source: Research Square preprint supplement (doi:10.21203/rs.3.rs-5099874/v1), 2026-01-20
Supplement: Supplementary file 2 [file 332177a423d4fe6c8709a78a.docx]

**Additional file 1**

**Table A1:** Search strategy1 used across databases.

|  | **PubMed** | **CINAHL** | **PsycINFO** | **Embase** | **Emcare** |
| --- | --- | --- | --- | --- | --- |
| **ACP** | (("advance care planning"[MeSH Terms]) OR ("living wills"[MeSH Terms])) OR ("advance directives"[MeSH Terms]) | (MM "Advance Care Planning") OR (MH "Advance Directives+") OR (MH "Living Wills") | MA "advance care planning" OR MA "advance directives" OR MA "living will" | 'advance care planning'/mj OR 'living will'/exp | *advance care planning/ OR living will/ |
| **Public’s** | public opinion[MeSH Terms] | (MH public opinion) | (MA public opinion) | 'public opinion'/exp | public opinion/ |
| **perception** | perception[MeSH Terms] | (MH "Perception+") | MA perception | OR 'perception'/exp | perception/ |
| **Awareness** | awareness[MeSH Terms] | (MH "Self-Awareness") OR (MH "Cognition+") | (MA awareness) | 'awareness'/exp | awareness/ |
| **Attitude** | ("attitude to health"[MeSH Terms]) OR ("attitude to death"[MeSH Terms]) | (MH "Attitude to Illness+") OR (MH "Attitude to Death+") OR (MH "Attitude to Health+") OR (MH "Social Attitudes") | MA "attitude to health" OR MA "attitude to illness" OR MA "attitude to death" | 'attitude to health'/exp OR 'attitude to illness'/exp OR 'attitude to death'/exp OR 'social attitude'/exp | attitude to health/ or social attitude/ or attitude to death/ or attitude to illness/ |
| **Experience** | life experience[MeSH Terms] | (MH "Life Experiences+") | MA experience | 'experience'/exp OR 'personal experience'/exp | experience/ or personal experience/ |
| **Expectation** | "Patient Preference"[MeSH Terms] | (MH "Patient Preference") | MA "Patient Preference" | 'patient preference'/exp | patient preference/ |
| **Asia-Pacific** | ("asia"[MeSH Terms]) OR ("asian"[MeSH Terms]) | (MH "Asia+") OR (MH "Asians+") | MA Asia OR MA asian | 'asia'/exp OR 'asian'/exp | Asia/ OR Asian/ |
| ("pacific island people"[MeSH Terms]) OR ("pacific islands"[MeSH Terms]) | (MH "Pacific Islanders") OR (MH "Pacific Islands+") | MA pacific OR MA "pacific islands" | 'pacific islands'/exp OR 'pacific islander'/exp | Pacific Islander/ or Pacific islands/ |

CINAHL – Cumulative Index of Nursing and Allied Health Literature. *Search term abbreviations:* MA - MeSH Subject Heading (in PsycINFO), MeSH – Medical Subject Headings (in PubMed), MH - Exact Subject Heading (in CINAHL), MM – Exact Major Subject Heading (in CINAHL)

1Limits applied: English language; Human; Adults (≥18 years); peer-reviewed articles; Publication date from 2013 to October 2023.

**Table A2 :** Data extracted and categories of primary study outcomes of interest explained with examples

| **General details of studies extracted** | | |
| --- | --- | --- |
| Author Details | Target population | Findings - generally |
| Year of Publication | Setting | Elements of Advance Care Planning |
| Title | Sample characteristics (e.g., age, gender, education level, geographical location) | Outcomes relating to Advance Care Planning |
| Country | Methods (recruitment, data collection, analysis) | Other important information |
| Aims/Objectives/Purpose | Instruments used and Intervention details | Limitations |
| Study Design/Methodology | Primary outcome measure/s |  |
|  |  |  |
| **Categories of Primary Study Outcomes of Interest** | | |
|  | **Explanation** (adapted from Martina et al., 2021) | **Example** |
| Awareness | The public has heard of, understands, or has knowledge about Advance Care Planning (ACP), advance directives (ADs), or related legislation. | Only 14.4% of community-dwelling individuals in Singapore had heard about ACP (Ng et al, 2017). |
| Attitudes | Public beliefs, perceptions, or values regarding the usefulness, appropriateness, or cultural acceptability of ACP/ADs. | In Hong Kong, most respondents agreed that family members should be involved in discussing making ADs and that healthcare professionals should have good communication skills when discussing making ADs (Chan et al., 2019). |
| Experiences | Previous direct or indirect encounters with ACP/ADs (e.g., previous discussions, witnessing ACP with relatives, or personal completion of ACP/ADs). | Among Australian adults, 10% had completed ACP documentation; of those who discussed ACP, 61% had told someone about their future treatment preferences, and 30% had documented their ACP preferences (Sellars et al., 2021). |
| Preferences | Stated wishes regarding how, when, and with whom for future ACP engagement, decision-making, or documentation. | Most Australian participants preferred healthcare professionals as the main source of ACP information support for substitute decision-making (Sellars et al., 2021) |

**Table A3:** Quality appraisal of included studies using the Mixed Methods Appraisal Tool (MMAT)1 criteria

| **Author/Year** | **Reviewers** | **Was sampling strategy relevant?** | **Is sample representative?** | **Are measurements appropriate?** | **Is there low non-response bias risk?** | **Were statistical analyses appropriate?** | **% RV Agreement across criteria**  *(Yes, No or ?)* | **% Both RVs agreed met criteria**  *(Yes only)* |
| --- | --- | --- | --- | --- | --- | --- | --- | --- |
| Quantitative Descriptive – Survey | | | | | | | | |
| **Chan et al., 2019** | RV1 | 1 | 1 | 1 | ? | 1 | 100 | 80 |
| RV2 | 1 | 1 | 1 | ? | 1 |
| **Chung et al., 2017** | RV1 | 1 | 1 | ? | ? | 1 | 100 | 60 |
| RV2 | 1 | 1 | ? | ? | 1 |
| **Groenewoud et al., 2020** | RV1 | 1 | 1 | ? | ? | 1 | 80 | 60 |
| RV3 | 1 | 1 | 1 | ? | 1 |
| **Keam et al., 2013** | RV1 | 1 | 1 | ? | 1 | 1 | 100 | 80 |
| RV2 | 1 | 1 | ? | 1 | 1 |
| **Leong et al., 2021** | RV1 | 1 | 1 | 1 | 1 | 1 | 80 | 80 |
| RV2 | 1 | 1 | 1 | ? | 1 |
| **Lim et al., 2022** | RV1 | 1 | ? | 1 | 1 | 1 | 60 | 60 |
| RV2 | 1 | 1 | 1 | ? | 1 |
| **Ng et al., 2017** | RV1 | 1 | 1 | 1 | 0 | 1 | 80 | 60 |
| RV3 | 1 | ? | 1 | 0 | 1 |
| **Ni et al., 2021** | RV1 | ? | 1 | ? | ? | 1 | 60 | 40 |
| RV3 | 1 | 1 | 1 | ? | 1 |
| **Park et al., 2019** | RV1 | 1 | 1 | ? | ? | 1 | 80 | 60 |
| RV3 | 1 | 1 | 1 | ? | 1 |
| **Sellars et al., 2021** | RV1 | 1 | 1 | ? | 1 | 1 | 80 | 80 |
| RV3 | 1 | 1 | 1 | 1 | 1 |
| **Whyte et al., 2022** | RV1 | 1 | 1 | 1 | ? | 1 | 100 | 80 |
| RV3 | 1 | 1 | 1 | ? | 1 |

RV: Reviewer

1 Reference for MMAT:Hong et al., 2018.

**0** = No, does not meet this criterion; **1** = Yes, meets this criterion; **?** = Can’t tell, not enough information provided to determine if meets this criterion or not
